# Supplementary material for: Nomenclature of Vertebral Laminae in Lizards, with Comments on Ontogenetic and Serial Variation in Lacertini (Squamata, Lacertidae)
Source: PLoS One. 2016 Feb 23;11(2):e0149445. doi: 10.1371/journal.pone.0149445 (PMC4764367; doi:10.1371/journal.pone.0149445)
Supplement: S4 Table — Boxes represent the vertebrae in the column, including the atlas. Filled boxes indicate presence of the lamina in the respective vertebrae, whereas a dash stands for absence. Only the seven specimens with articulated vertebral column could be assessed. (PDF) [file pone.0149445.s004.pdf]

Boxes represent the vertebrae in the column, including the atlas. Filled boxes indicate presence of the lamina in the respective vertebrae, whereas a dash stands for absence. Only the seven specimens with articulated vertebral column could be assessed.

| Species                  | Specimen | Cervical Vertebrae | Dorsal Vertebrae |
|--------------------------|----------|--------------------|------------------|
| <i>Lacerta agilis</i>    | MDHC 176 |                    |                  |
| <i>Lacerta agilis</i>    | MDHC 177 |                    |                  |
| <i>Lacerta agilis</i>    | MDHC 178 |                    |                  |
| <i>Lacerta bilineata</i> | MDHC 15  |                    |                  |
| <i>Lacerta bilineata</i> | MDHC 77  |                    |                  |
| <i>Zootoca vivipara</i>  | MDHC 179 |                    |                  |
| <i>Takydromus</i> sp.    | MDHC 151 |                    |                  |
